# Supplementary material for: In Utero Exposure to Particulate Air Pollution during Pregnancy: Impact on Birth Weight and Health through the Life Course
Source: Int J Environ Res Public Health. 2020 Dec 1;17(23):8948. doi: 10.3390/ijerph17238948 (PMC7730886; doi:10.3390/ijerph17238948)
Supplement: Supplementary file 1 [file ijerph-17-08948-s001.pdf]

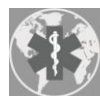

**Table S1.** Meta-analyses results for LBW or TLBW (\*) and PM<sub>10</sub> exposure during the entire pregnancy.

| Descriptive information on meta-study and all input studies |                                                                                                                                                                                      |                                                 |                                                                                                                                                                 | Meta-risk estimates for specific analyses                  |                                                |                                                                     |                                 |
|-------------------------------------------------------------|--------------------------------------------------------------------------------------------------------------------------------------------------------------------------------------|-------------------------------------------------|-----------------------------------------------------------------------------------------------------------------------------------------------------------------|------------------------------------------------------------|------------------------------------------------|---------------------------------------------------------------------|---------------------------------|
| Reference                                                   | Country/Region                                                                                                                                                                       | Range of participants/births                    | Exposure range (using study metrics)                                                                                                                            | Adjusted for/subgroup                                      | Studies included in risk estimate analysis (n) | OR/RR [95% CI], PM <sub>10</sub> per 10 µg/m <sup>3</sup> increment | Heterogeneity (I <sup>2</sup> ) |
| Sapkota et al. 2012(*) [28]                                 | USA (n = 9), Canada and Taiwan (n = 2 each), Germany, Brazil, Korea and (n = 1 each)                                                                                                 | Population: 128 to 374,167; Cases: 69 to 21,450 | Range of PM <sub>10</sub> means (where reported): 12.5-71.1 µg/m <sup>3</sup> ; Range of PM <sub>10</sub> medians (where reported): 7.84-30.1 µg/m <sup>3</sup> | NA                                                         | 11                                             | 1.02 [0.99, 1.06]                                                   | 54.5%                           |
| Stieb et al. 2012 [30]                                      | North America (n=27), Europe (n=18), Asia (n=10), Australia (n=4), South America (n=3)                                                                                               | Births: 153 to 3,303,834                        | PM <sub>10</sub> Min. /Max. average 24-hour concentrations (µg/m <sup>3</sup> ) among all studies: Min. 3.3 Max. 89.7                                           | NA                                                         | 14                                             | 1.05 [1.02, 1.07]                                                   | 68.4%                           |
| Dadvand et al. 2013(*) [27]                                 | North America (6), Europe (5), South America (1), Asia (1), Oceania (1)                                                                                                              | Births: ~1,000 to ~2 m                          | Range of PM <sub>10</sub> medians(wher reported): 12.5-66.5 µg/m <sup>3</sup>                                                                                   | NA                                                         | 13                                             | 1.04 [1.01, 1.06]                                                   | 76.5%                           |
|                                                             |                                                                                                                                                                                      |                                                 |                                                                                                                                                                 | adjusted for maternal SES                                  |                                                | 1.03 [1.01, 1.05]                                                   | 79.4%                           |
|                                                             |                                                                                                                                                                                      |                                                 |                                                                                                                                                                 | adjusted for maternal SES and centre specific covariates** |                                                | 1.02 [1.01, 1.04]                                                   | 54.3%                           |
| Guo et al. 2019 [31]                                        | USA (n = 17), Canada (n = 4), Brazil and China (n = 3 each), Spain, Australia, South Korea, and multi-country (n = 2 each), Iran, UK, Taiwan, Norway, Sweden, and Japan (n = 1 each) | Births: 225 to 2,402,545                        | NA                                                                                                                                                              |                                                            | 11                                             | 1.03 [1.01, 1.04]                                                   | 73.3%                           |
|                                                             |                                                                                                                                                                                      |                                                 |                                                                                                                                                                 | adjusted for maternal smoking                              | 6                                              | 1.03 [1.01, 1.05]                                                   | 68.6%                           |
|                                                             |                                                                                                                                                                                      |                                                 |                                                                                                                                                                 | not adjusted for maternal smoking                          | 5                                              | 1.01 [0.98, 1.05]                                                   | 78.0%                           |
|                                                             |                                                                                                                                                                                      |                                                 |                                                                                                                                                                 | NOS*** score ≤ 7                                           | 3                                              | 0.99 [0.93, 1.04]                                                   | 76.8%                           |
|                                                             |                                                                                                                                                                                      |                                                 |                                                                                                                                                                 | NOS*** score ≥ 7                                           | 8                                              | 1.07 [1.03, 1.11]                                                   | 62.3%                           |
|                                                             |                                                                                                                                                                                      |                                                 |                                                                                                                                                                 | Asian setting                                              | 2                                              | 0.93 [0.84, 1.02]                                                   | 30.2%                           |
|                                                             |                                                                                                                                                                                      |                                                 |                                                                                                                                                                 | Non-Asian setting                                          | 9                                              | 1.03 [1.01, 1.05]                                                   | 74.0%                           |

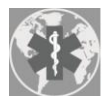

|                               |                                                                                                                                                                                                     |                        |    |                    |       |                   |       |
|-------------------------------|-----------------------------------------------------------------------------------------------------------------------------------------------------------------------------------------------------|------------------------|----|--------------------|-------|-------------------|-------|
| Ji et al.<br>2019 [34]        | USA and Canada (n = 3 each), Iran, Korea, Netherlands, Taiwan, Brazil, UK, Spain, multi-country (n = 1 each)                                                                                        | Births: 225 to 423,719 | NA |                    | 9     | 1.01 [0.96, 1.08] | 67.5% |
|                               |                                                                                                                                                                                                     |                        |    | Asia               | 3**** | 0.98 [0.90, 1.07] | 48.6% |
|                               |                                                                                                                                                                                                     |                        |    | Europe and America | 9     | 1.05 [1.01, 1.09] | 54.2% |
| Li et al.<br>2020<br>****[32] | USA (n = 20), China (n = 9), Korea (n = 5), Canada (n = 4), Japan, Lithuania, Spain, UK (n = 2 each), Australia, Czech republic, India, Iran, Peru, Poland, Puerto Rico, multi-country (n = 1 each) | 225 to 3,545,177       | NA |                    | 23    | 1.05 [1.03, 1.08] | 70.3% |
|                               |                                                                                                                                                                                                     |                        |    | The Americas       | 6     | 1.02 [0.97, 1.07] | >50%  |
|                               |                                                                                                                                                                                                     |                        |    | Asia               | 14    | 1.05 [1.02, 1.08] | >50%  |
|                               |                                                                                                                                                                                                     |                        |    | Europe             | 3     | 1.11 [1.07, 1.17] | <50%  |

\*\* Centre specific covariates = covariates specific to the locations where the data was generated/collected

\*\*\* Newcastle-Ottawa quality score for assessing the quality of nonrandomised studies in meta-analyses  
([http://www.ohri.ca/programs/clinical\\_epidemiology/oxford.asp](http://www.ohri.ca/programs/clinical_epidemiology/oxford.asp))

\*\*\*\* We assume the following studies have been analysed as “Asia” subgroup: [1-3]

\*\*\*\*\* The authors report Relative Risk (RR) estimates



**Table S2.** Meta-analyses results for change in BW (g) and PM<sub>10</sub> exposure during the entire pregnancy.

| Descriptive information on meta-study and all input studies |                                                                                           |                              |                                                                                                                                 | Meta-risk estimates for specific analyses                 |                                                |                                                                               |                                 |
|-------------------------------------------------------------|-------------------------------------------------------------------------------------------|------------------------------|---------------------------------------------------------------------------------------------------------------------------------|-----------------------------------------------------------|------------------------------------------------|-------------------------------------------------------------------------------|---------------------------------|
| Reference                                                   | Country/Region                                                                            | Range of births/participants | Exposure range (using study metrics)                                                                                            | Adjusted for/subgroup                                     | Studies included in risk estimate analysis (n) | change in BW [g] [95% CI] PM <sub>10</sub> per 10 µg/m <sup>3</sup> increment | Heterogeneity (I <sup>2</sup> ) |
| Stieb et al. 2012 [30]                                      | North America (n=27), Europe (n=18), Asia (n=10), Australia (n=4), South America (n=3)    | Births: 153 to 3,303,834     | PM <sub>10</sub> Min. /Max. average 24-hour concentrations (µg/m <sup>3</sup> ) among all studies:<br><br>Min. 3.3<br>Max. 89.7 |                                                           | 7                                              | -8.4 [-10.1, -6.65]                                                           | 15.9%                           |
| Dadvand et al. 2013 [27]                                    | North America (n=6), Europe (n=5), South America (n=1), Asia (n=1), Oceania (n=1)         | Births: ~1,000 to ~2 m       | Range of PM <sub>10</sub> (where reported): 12.5-66.5 µg/m <sup>3</sup>                                                         |                                                           | 11                                             | -2.7 [-7.2, 1.7]                                                              | NA                              |
|                                                             |                                                                                           |                              |                                                                                                                                 | adjusted for maternal SES                                 | 11                                             | -3.0 [-6.9, 0.9]                                                              | NA                              |
|                                                             |                                                                                           |                              |                                                                                                                                 | adjusted for maternal SES and centre specific covariates* | 11                                             | -8.9 [-13.2, -4.6]                                                            | NA                              |
| Lamichhane et al. 2015 [29]                                 | North America (n=25) , Asia (n=7), Europe (n=6), Australia (n=4), and South America (n=2) | Births: 235 to 3,303,834     | Range of PM <sub>10</sub> means (where reported): 2.97-89.7 µg/m <sup>3</sup>                                                   | combined studies                                          | 8                                              | -6.50 [-10.94, -2.5]                                                          | 76.4%                           |
|                                                             |                                                                                           |                              |                                                                                                                                 | adjusted for maternal smoking                             | 5                                              | -10.31 [-13.57, -7.05]                                                        | 0.0%                            |
|                                                             |                                                                                           |                              |                                                                                                                                 | not adjusted for maternal smoking                         | 3                                              | -8.17 [-10.99, -5.36]                                                         | 35.2%                           |
|                                                             |                                                                                           |                              |                                                                                                                                 | relatively better quality studies**                       | 5                                              | -10.59 [-13.24, -7.94]                                                        | 0.0%                            |
|                                                             |                                                                                           |                              |                                                                                                                                 | relatively low quality studies**                          | 4                                              | -2.86 [-12.35, 6.64]                                                          | 89.9%                           |

\* Centre specific covariates = covariates specific to the locations where the data was generated/collected

\*\* Quality assessment based on checklist by [4]



1. Araban, M.; Kariman, N.; Tavafian, S.; Motesaddi, S.; Alavimajd, H.; Shokravi, F.A. Air Pollution and Low Birth Weight: A Historical Cohort Study from Tehran/Pollution Atmospherique Et Faible Poids De Naissance: Une Etude De Cohorte Historique a Teheran. *Eastern Mediterranean Health Journal* **2012**, *18*, 556-561.
2. Kim, O.; Ha, E.; Kim, B.; Seo, J.; Park, H.; Jung, W.; Lee, B.; Suh, Y.; Kim, Y.; Lee, J. PM10 and Pregnancy Outcomes: A Hospital-Based Cohort Study of Pregnant Women in Seoul. *Journal of occupational and environmental medicine* **2007**, *49*, 1394-1402.
3. Lin, C.; Li, C.; Yang, G.; Mao, I. Association between Maternal Exposure to Elevated Ambient Sulfur Dioxide during Pregnancy and Term Low Birth Weight. *Environ. Res.* **2004**, *96*, 41-50.
4. Downs, S.H.; Black, N. The Feasibility of Creating a Checklist for the Assessment of the Methodological Quality both of Randomised and Non-Randomised Studies of Health Care Interventions. *J. Epidemiol. Community Health* **1998**, *52*, 377-384.
